# Supplementary material for: Antiproliferative Imidazo-Pyrazole-Based Hydrogel: A Promising Approach for the Development of New Treatments for PLX-Resistant Melanoma
Source: MDPI journal article supplement (doi:10.3390/pharmaceutics15102425), 2023-10-04
Supplement: s1 [file s1]

## Supplementary Materials

# Antiproliferative Imidazo-Pyrazole-Based Hydrogel: A Promising Approach for the Development of New Treatments for PLX-Resistant Melanoma

Silvana Alfei <sup>1,\*</sup>, Marco Milanese <sup>1</sup>, Chiara Brullo <sup>2</sup>, Giulia Elda Valenti <sup>3</sup>, Cinzia Domenicotti <sup>3</sup>, Eleonora Russo <sup>2</sup>, and Barbara Marengo <sup>3,\*</sup>

<sup>1</sup> Section of Chemistry and Pharmaceutical and Food Technologies, Department of Pharmacy, University of Genoa, Viale Cembrano, 4, 16148 Genoa, Italy; marco.milanese@unige.it

<sup>2</sup> Section of Medicinal Chemistry and Cosmetic Product, Department of Pharmacy (DIFAR), University of Genoa, Viale Benedetto XV, 3, 16132 Genoa, Italy; chiara.brullo@unige.it (C.B.); eleonora.russo@unige.it (E.R.)

<sup>3</sup> Department of Experimental Medicine (DIMES), University of Genova, Via Alberti L.B., 16132 Genoa, Italy; giuliaelda.valenti@edu.unige.it (G.E.V.); cinzia.domenicotti@unige.it (C.D.)

\* Correspondence: alfei@difar.unige.it (S.A.); barbara.marengo@unige.it (B.M.); Tel.: +39-010-355-2296 (S.A.)

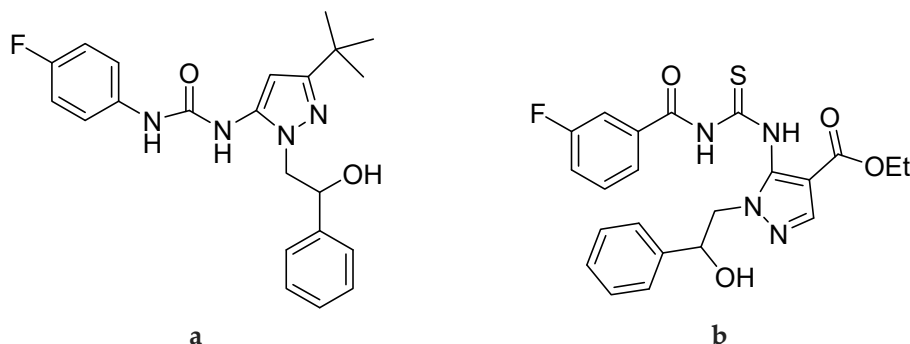

**Figure S1.** Chemical structure of previously reported anti-bacterial pyrazoles **3c** (a) and **4b** (b).

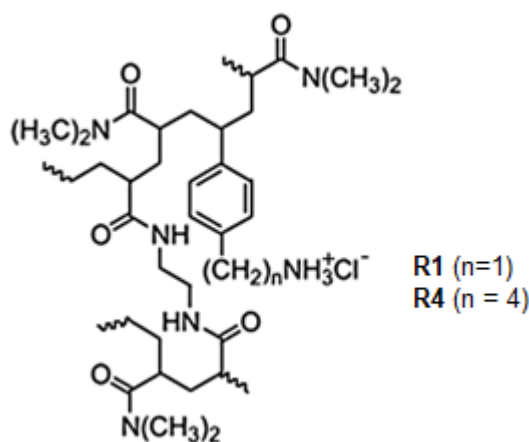

**Figure S2.** Chemical structure of previously reported resin **R1** ( $n = 1$ ) and **R4** ( $n = 4$ ).

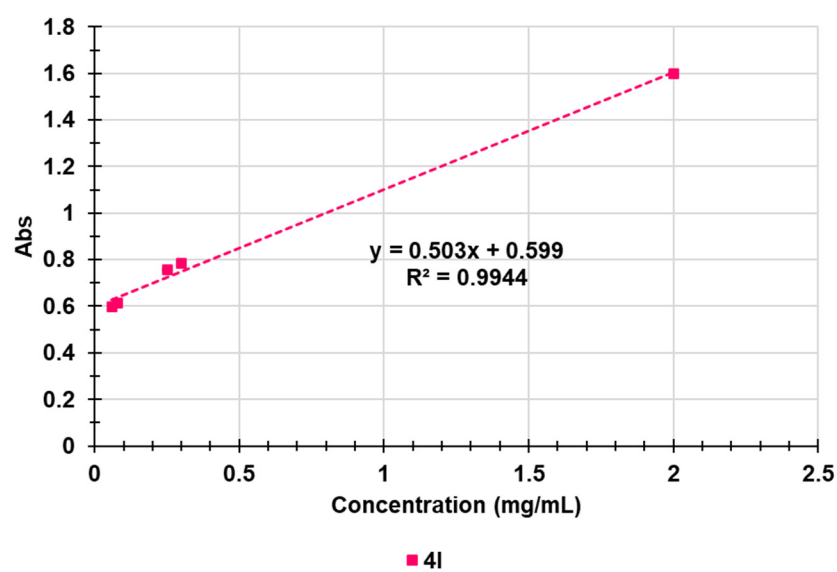

Figure S3. 4I calibration curve.

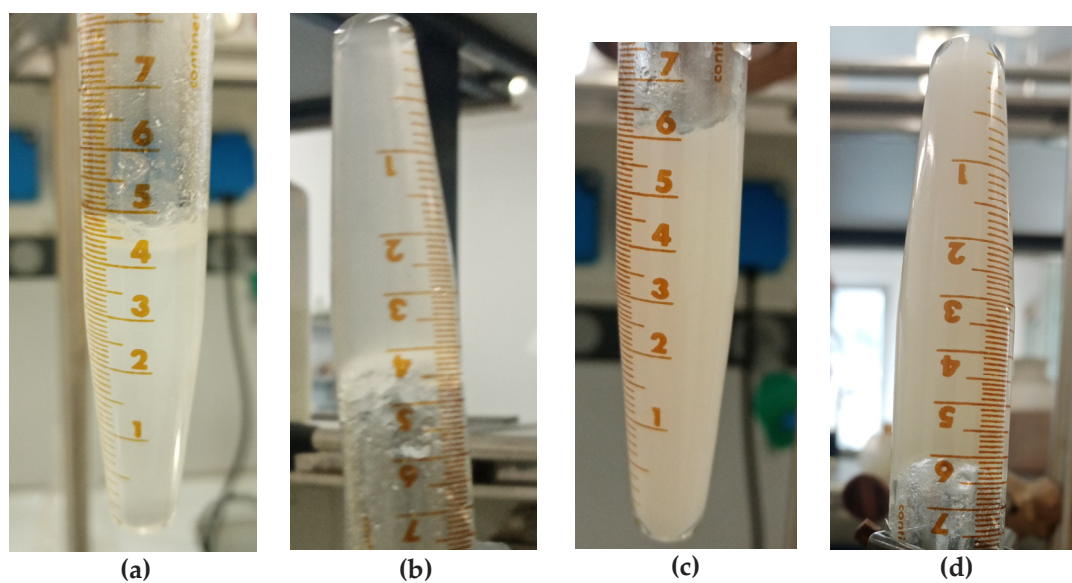

Figure S4. Appearance of R4HG (a,b) and R4HG-4I (c,d) at their equilibrium degree of swelling (EDS).

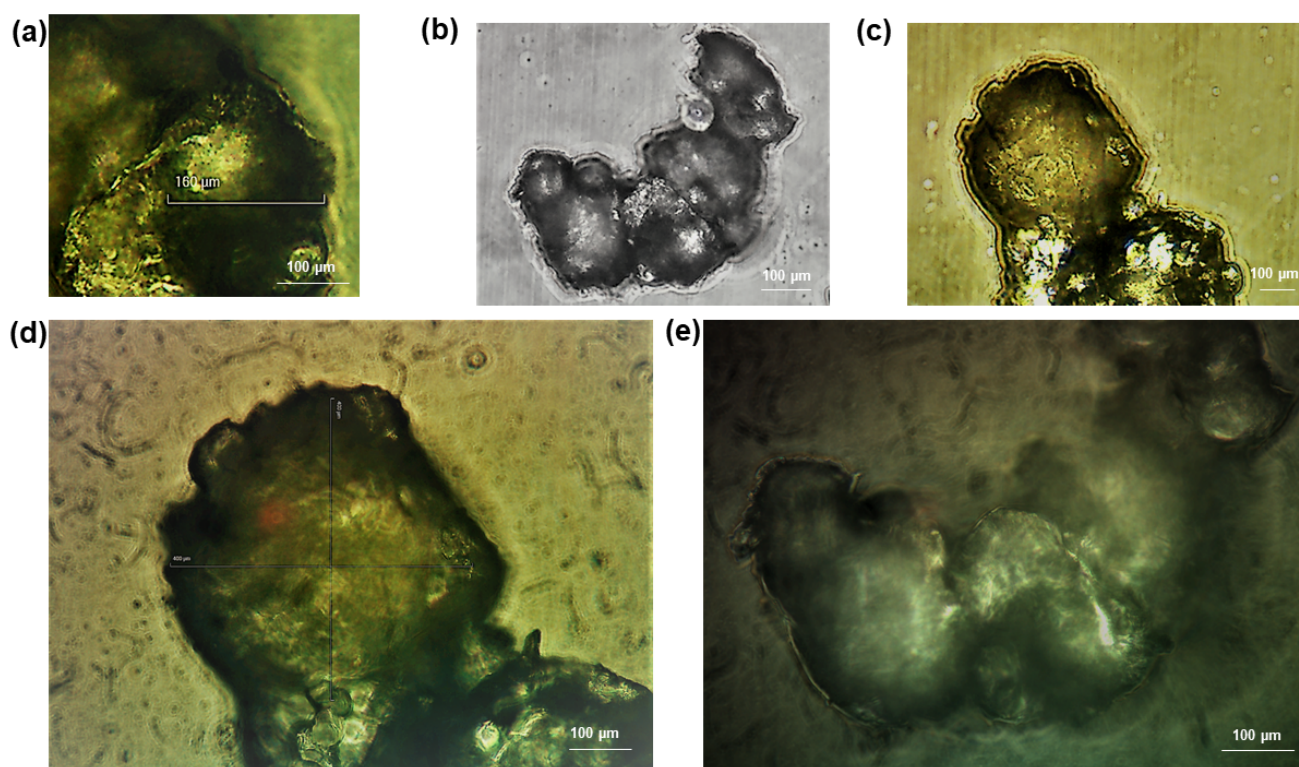

**Figure S5.** Representative optical microphotographs of R4HG after drying at 100°C until a constant weight equal to that before swelling was achieved (R4HG-D). Objective 40 × (a, d, e), 20 × (b, c).

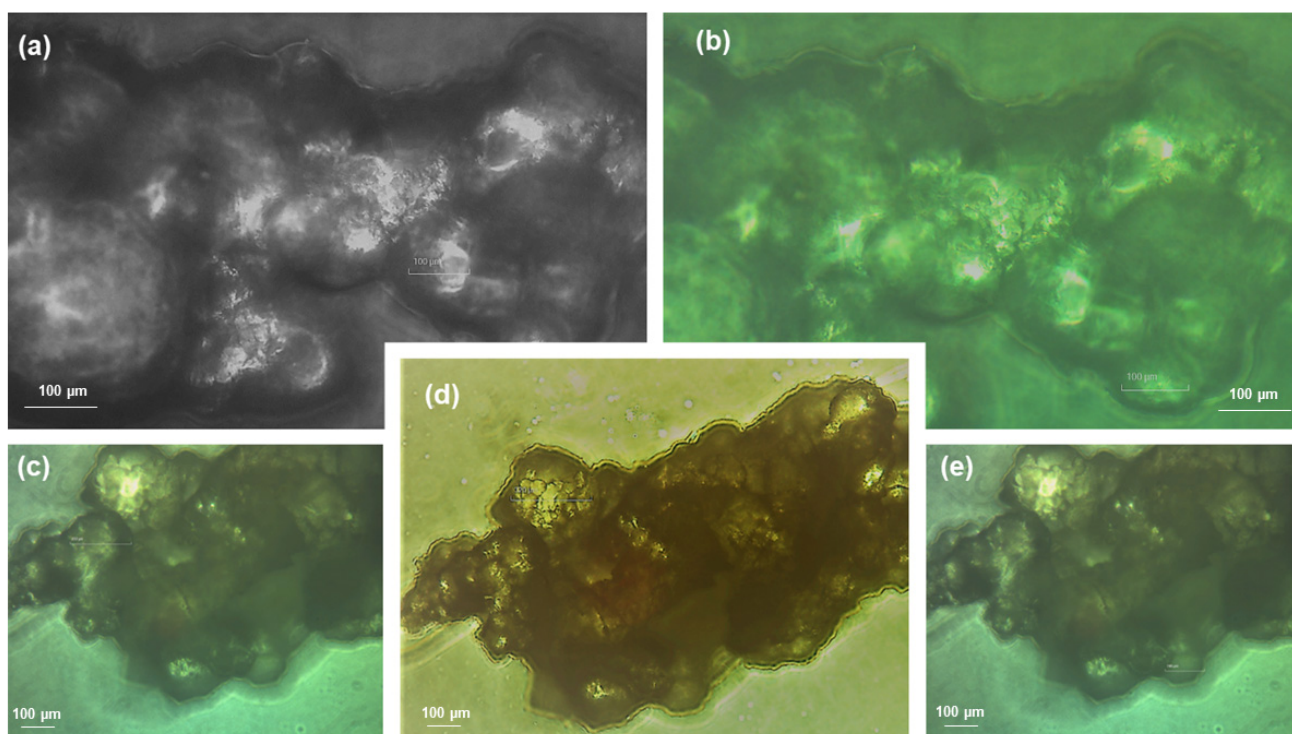

**Figure S6.** Representative optical microphotographs of R4HG-4I after drying at 100°C until a constant weight equal to that before swelling was achieved (R4HG-4I-D). Objective 40 × (a, b), 20 × (c, d, e).

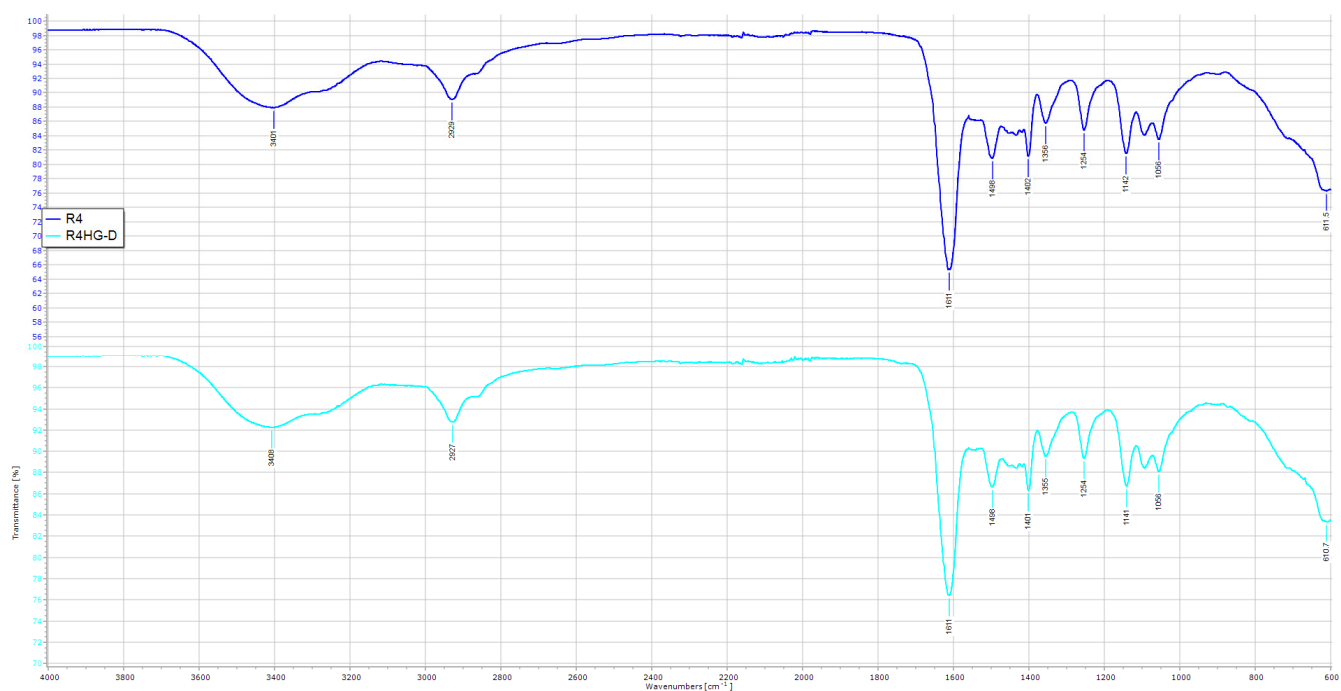

Figure S7. Representative ATR-FTIR spectra of resin R4 and fully dried hydrogel R4HG-D.

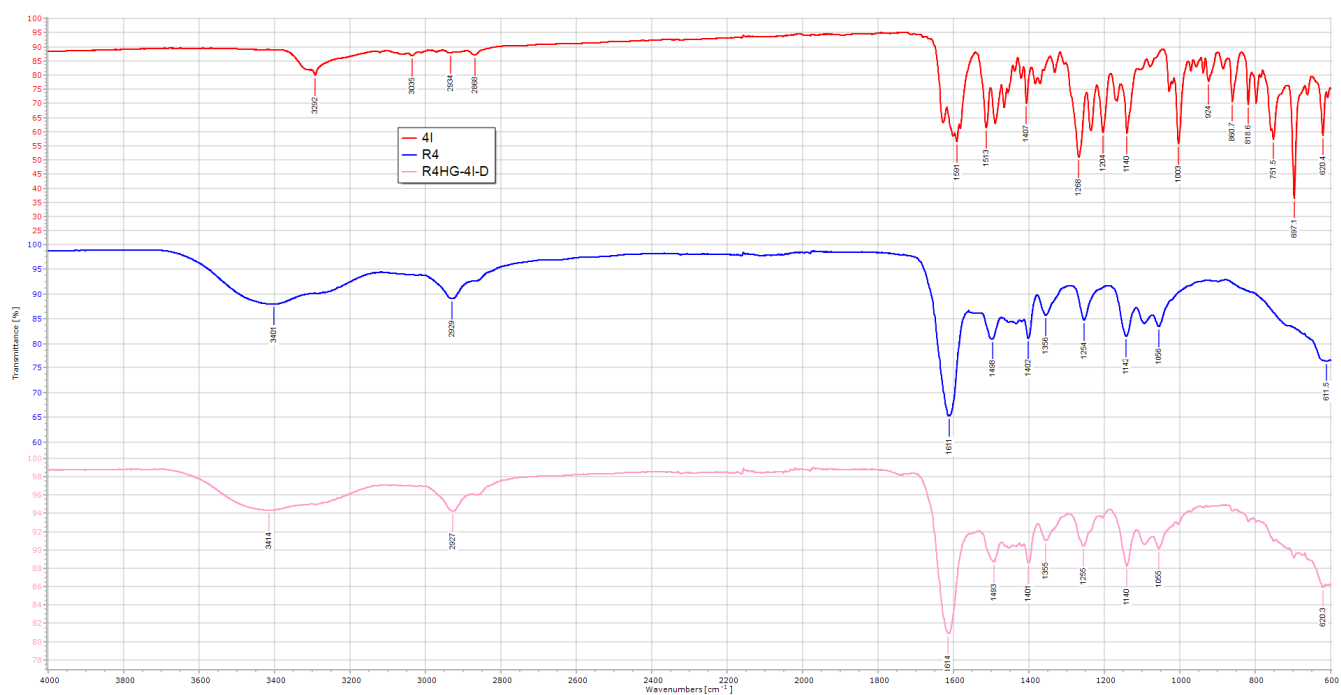

Figure S8. Representative ATR-FTIR spectra of resin R4, **4I** and fully dried hydrogel R4HG-4I-D.

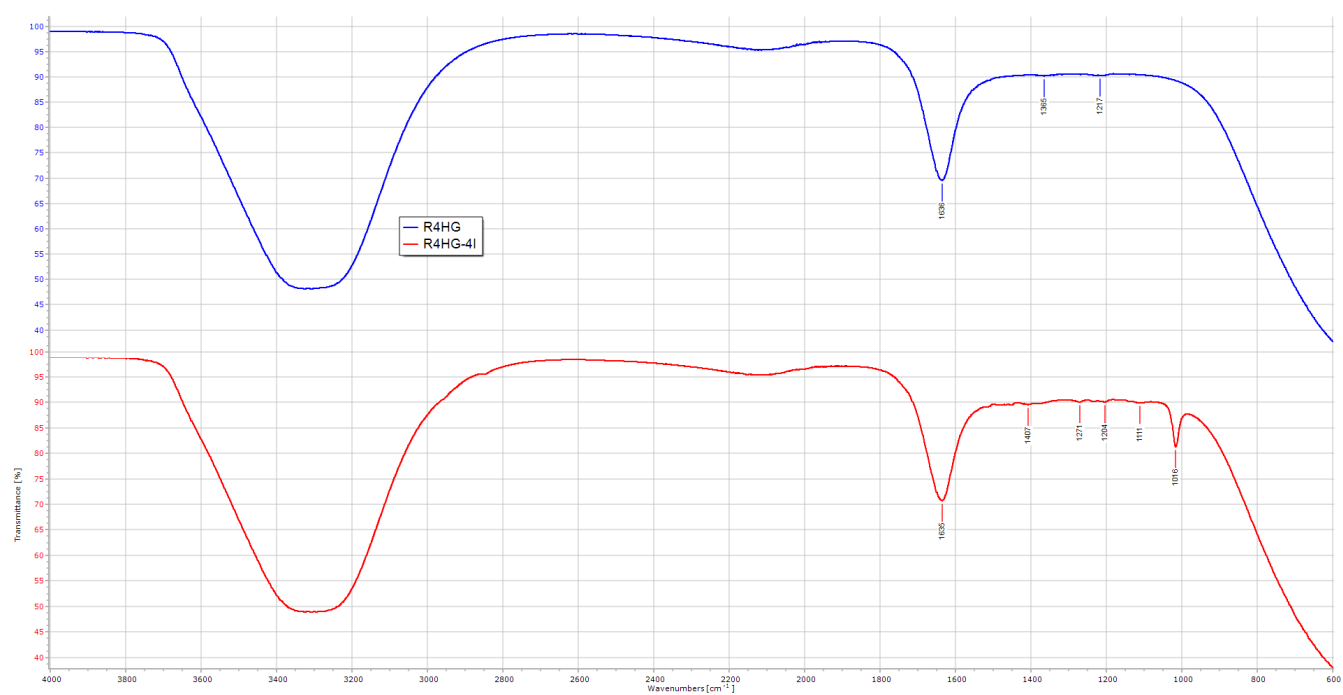

**Figure S9.** Representative ATR-FTIR spectra of swollen hydrogels R4HG and R4HG-4I.

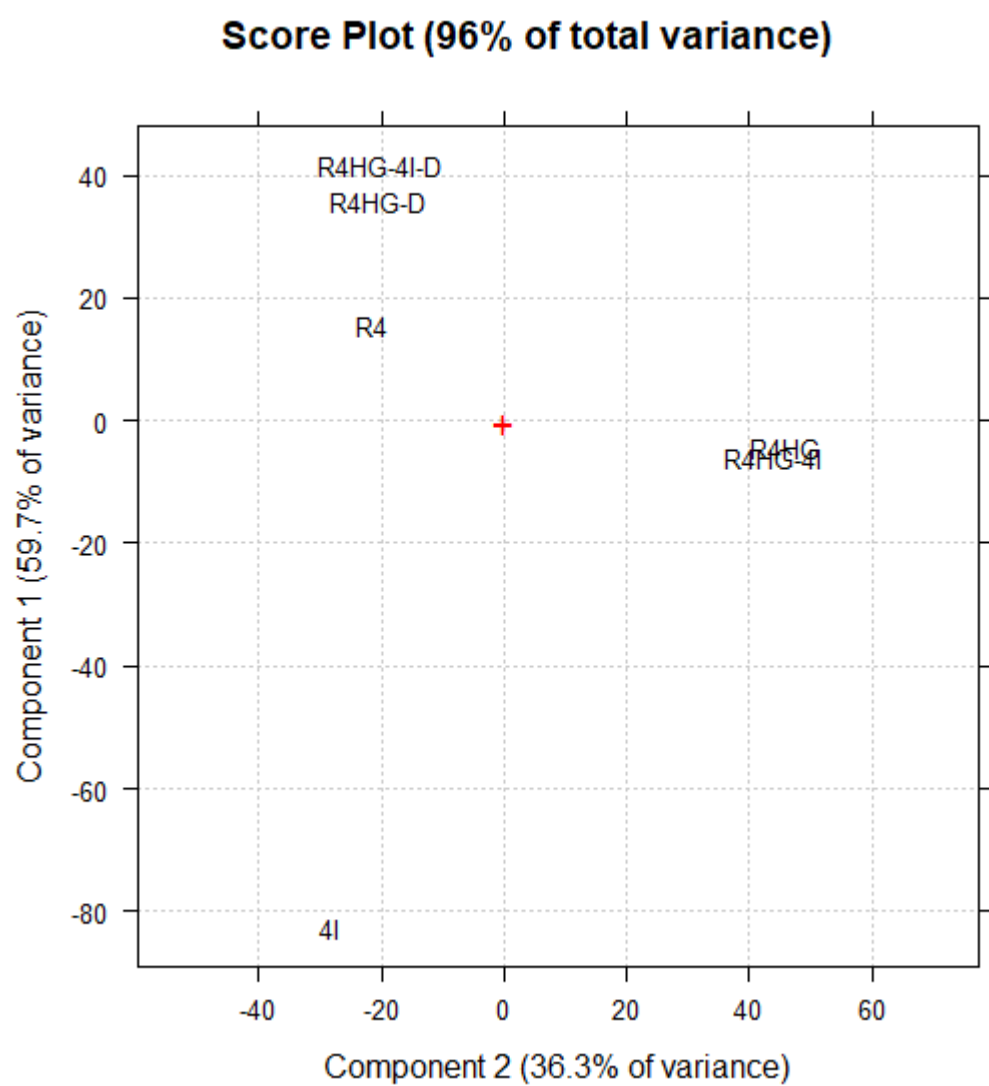

**Figure S10.** Score plot of PC1 (explaining the 59.7% of variance) vs. PC2 (explaining the 36.3% of variance).



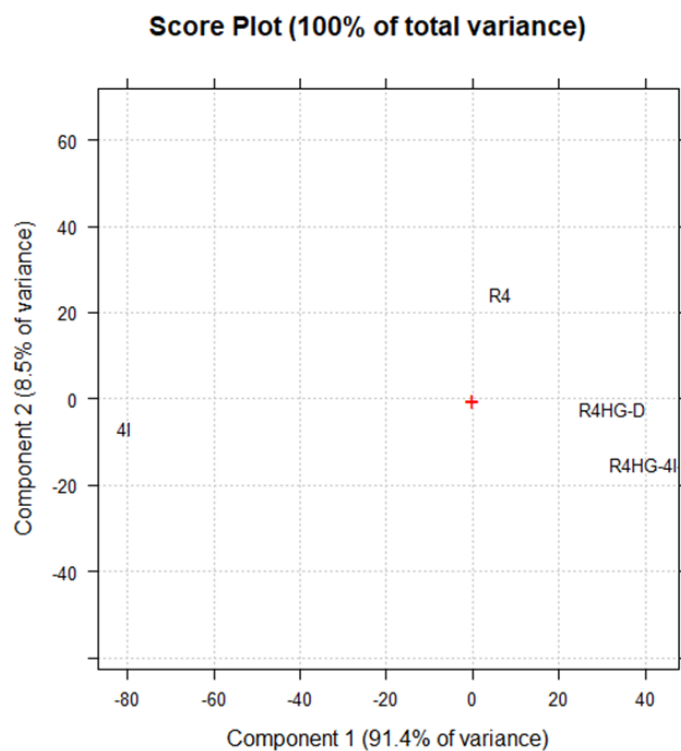

**Figure S11.** Score plot of PC1 (explaining the 91.4% of variance) vs. PC2 (explaining the 8.5% of variance).

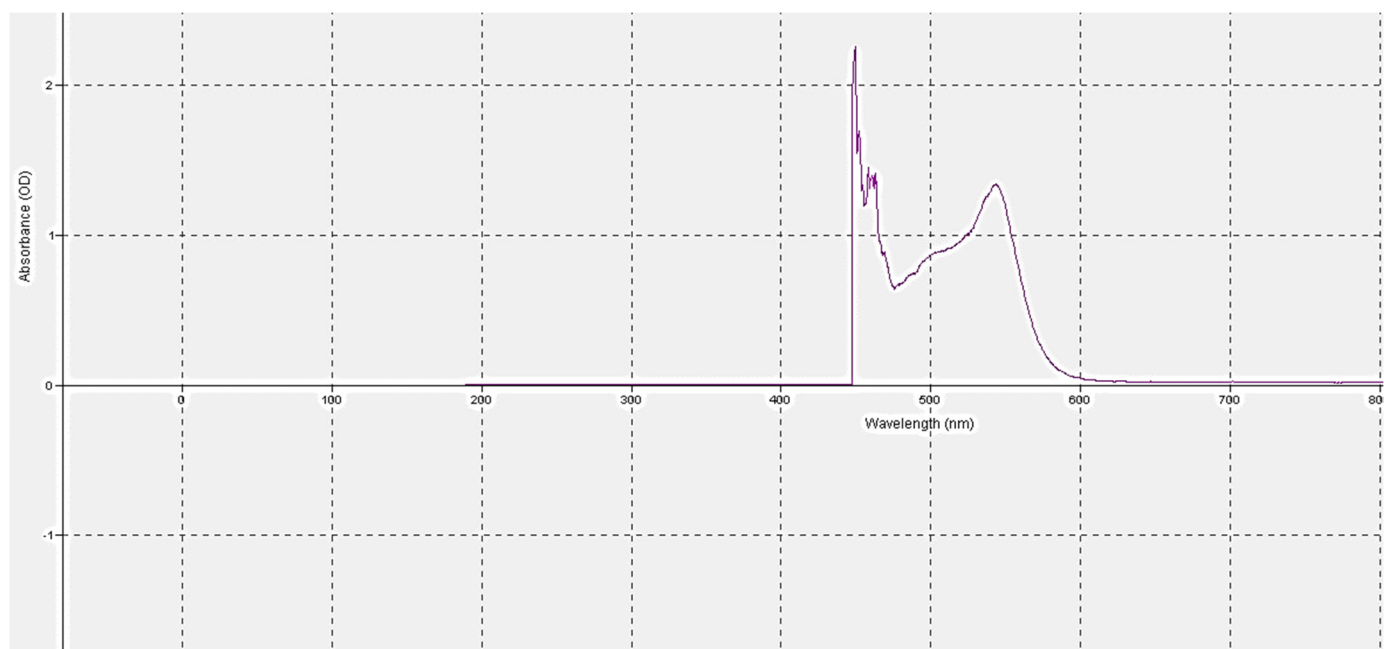

**Figure S12.** UV-Vis spectrum of 4I.

**Video S1.** <https://clipchamp.com/watch/LVAKVdP1F8f>.

**Video S2.** <https://clipchamp.com/watch/TtDuSbTIuWF>.

**Table S1.** Values of the coefficients of determination obtained for all the kinetic models used.

| Kinetic Model    | R <sup>2</sup> of R4HG | R <sup>2</sup> of R4HG-4I |
|------------------|------------------------|---------------------------|
| Zero-order       | 0.8940                 | 0.8451                    |
| First-order      | 0.9594                 | 0.9422                    |
| Hixson–Crowel    | 0.8940                 | 0.8451                    |
| Higuchi          | 0.9684                 | 0.9580                    |
| Korsmeyer–Peppas | 0.9828                 | 0.9711                    |

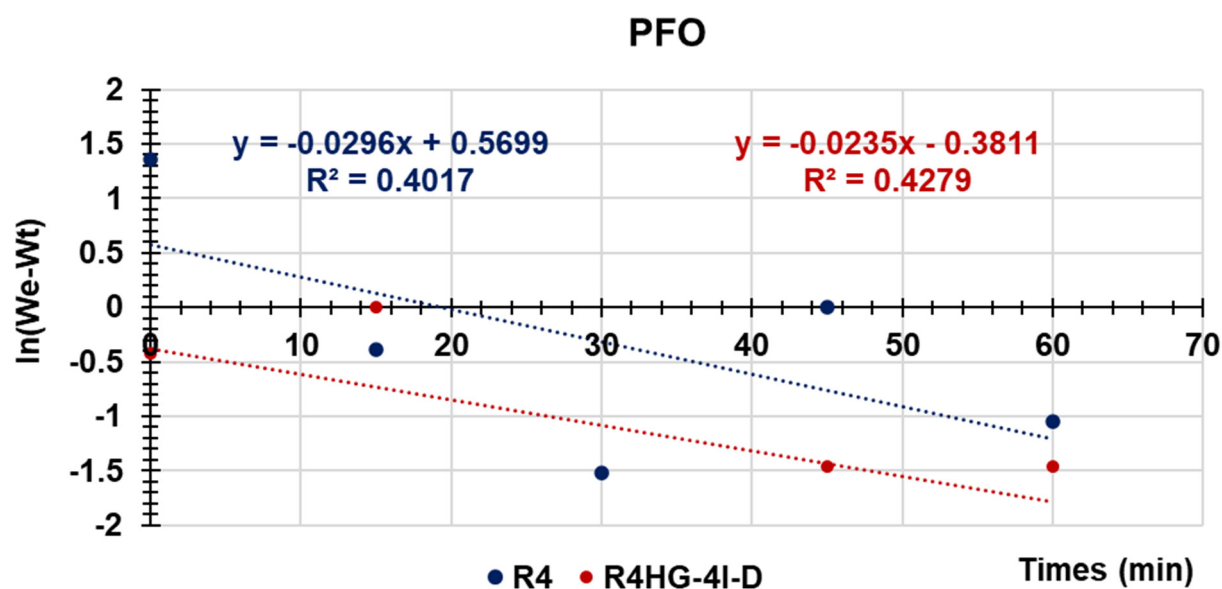**Figure S13.** PFO kinetic model (We and Wt expressed as mg).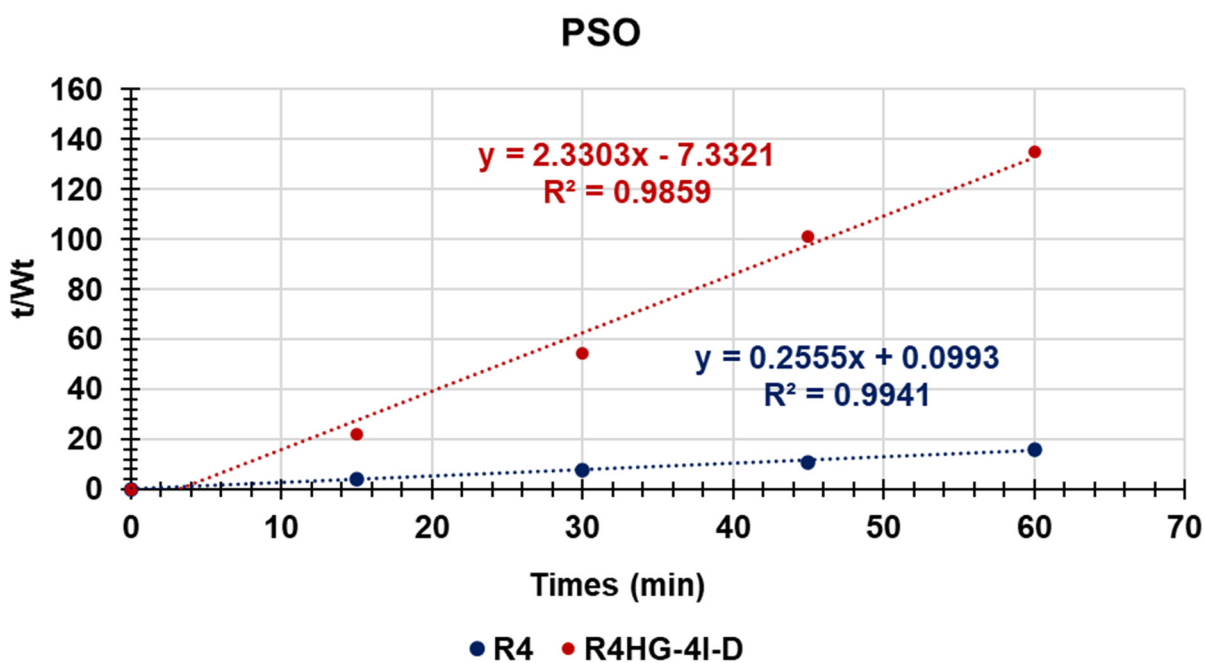**Figure S14.** PSO kinetic model (Wt expressed as mg;  $t/Wt = \text{mg} \times \text{min}$ ).



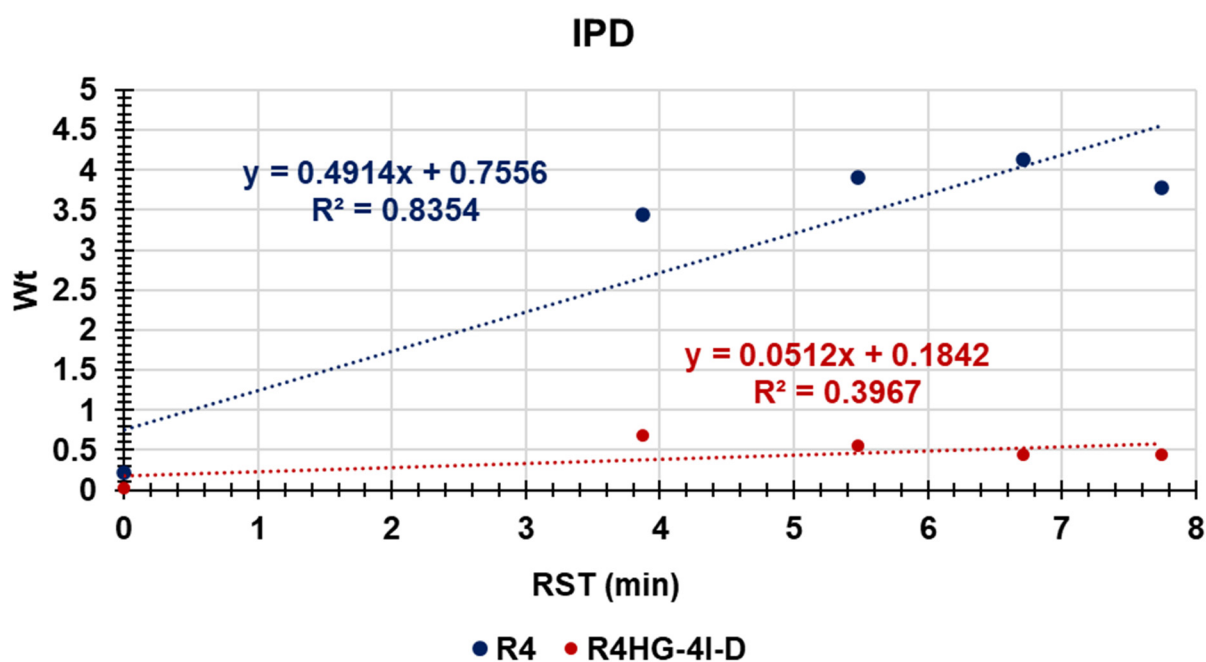

Figure S15. IPD kinetic model (Wt expressed as mg). RST = root square of times.

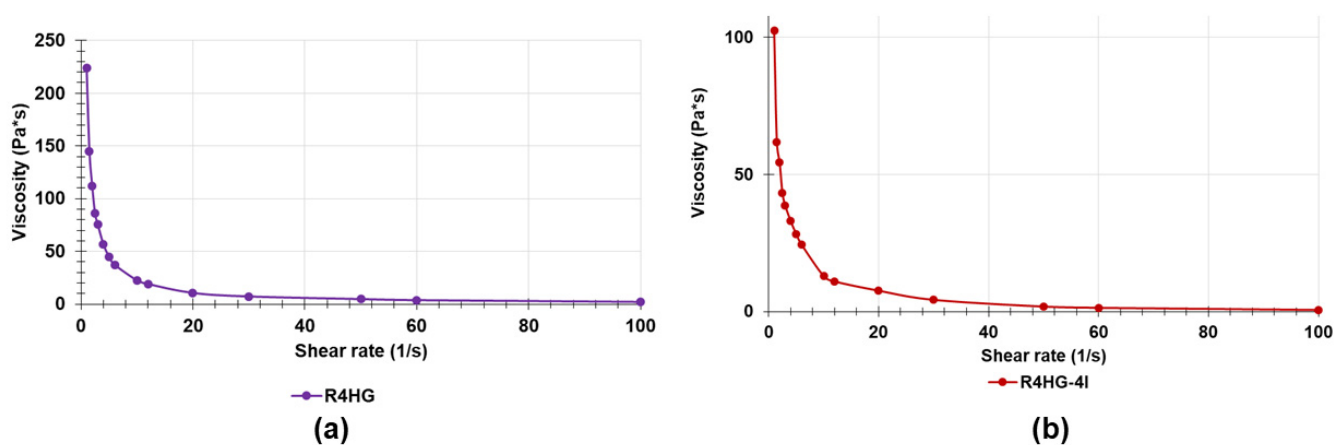

Figure S16. Curve of the viscosity vs. shear rate of R4HG (a) and R4HG-4I (b).

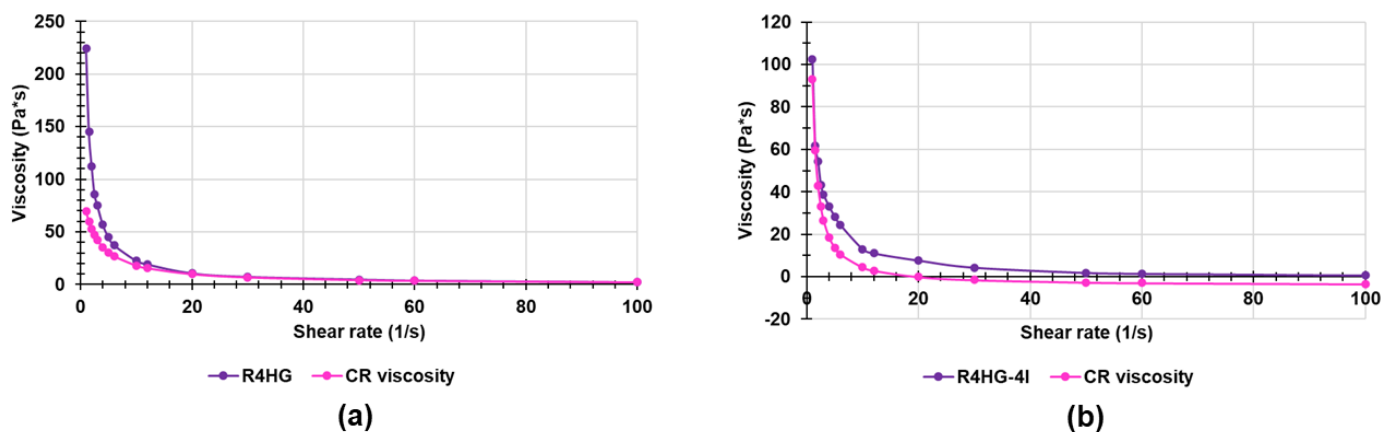

Figure S17. Relationships between the CR viscosity and  $\gamma$  for R4HG (a) and R4HG-4I (b) (fuchsia lines) and the experimental measurements (purple lines).

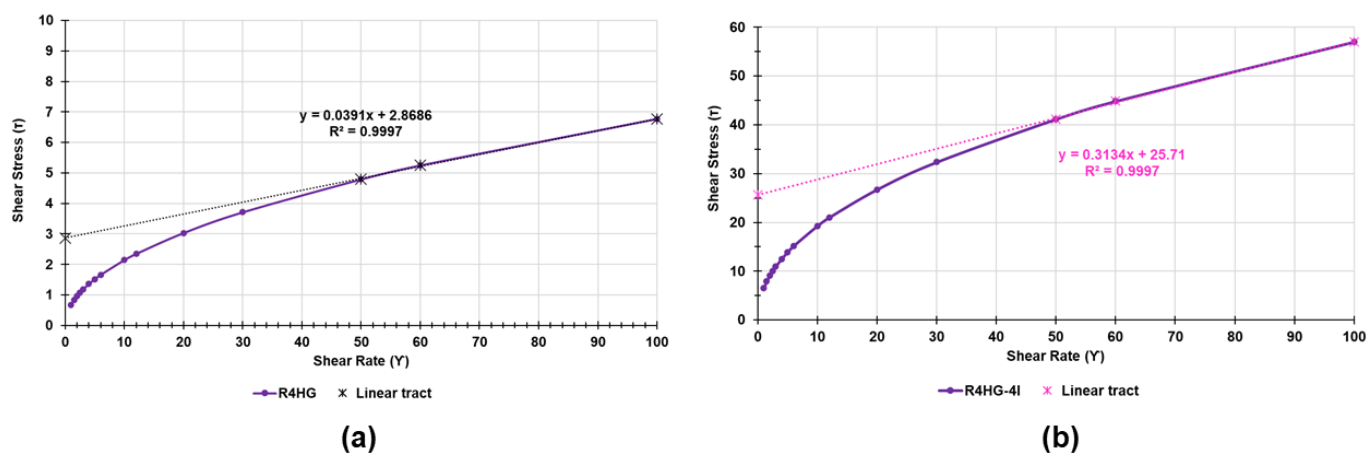

**Figure S18.** Plots of  $\tau$  (Pa) vs.  $\gamma$  ( $s^{-1}$ ) of R4HG (a) and R4HG-4I (b). The intercept of equations associated with the linear tract of the curves provides the values of the yield stress reported in Table 7 (main text).

**Table S2.** Values of coefficients of determinations ( $R^2$ ) obtained for all kinetic models considered.

| Kinetic Model | Coefficients of Determination ( $R^2$ ) |               |
|---------------|-----------------------------------------|---------------|
|               | R4HG                                    | R4HG-4I       |
| PFO           | 0.4017                                  | 0.4279        |
| PSO           | <b>0.9944</b>                           | <b>0.9859</b> |
| IPD           | 0.8354                                  | 0.3967        |

### Zero Order

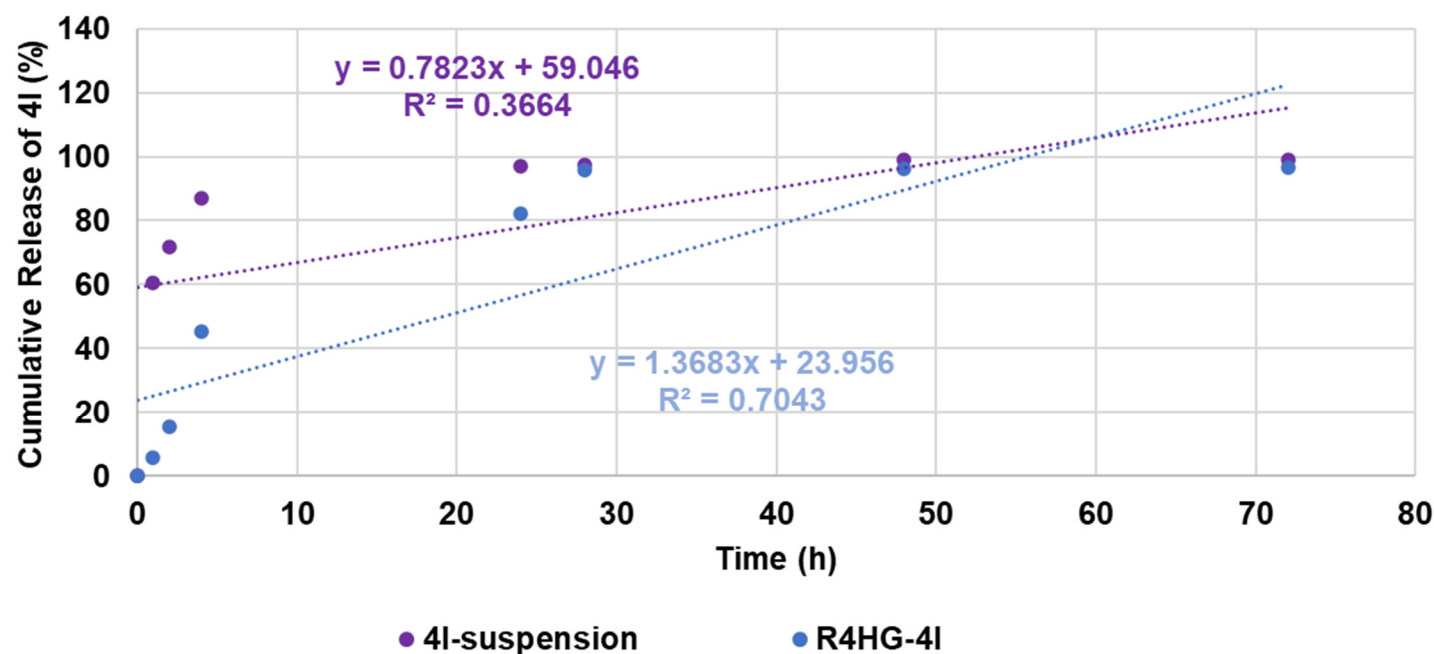

**Figure S19.** Zero order kinetic models.

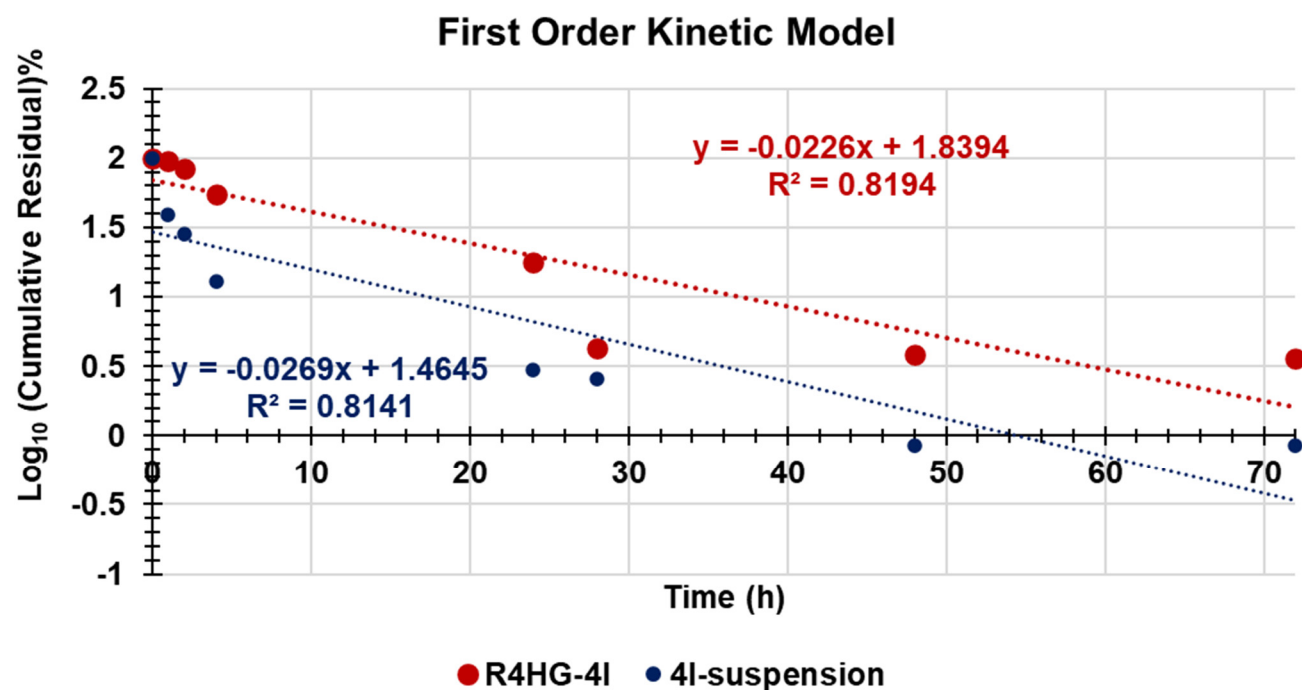

Figure S20. First order kinetic models.

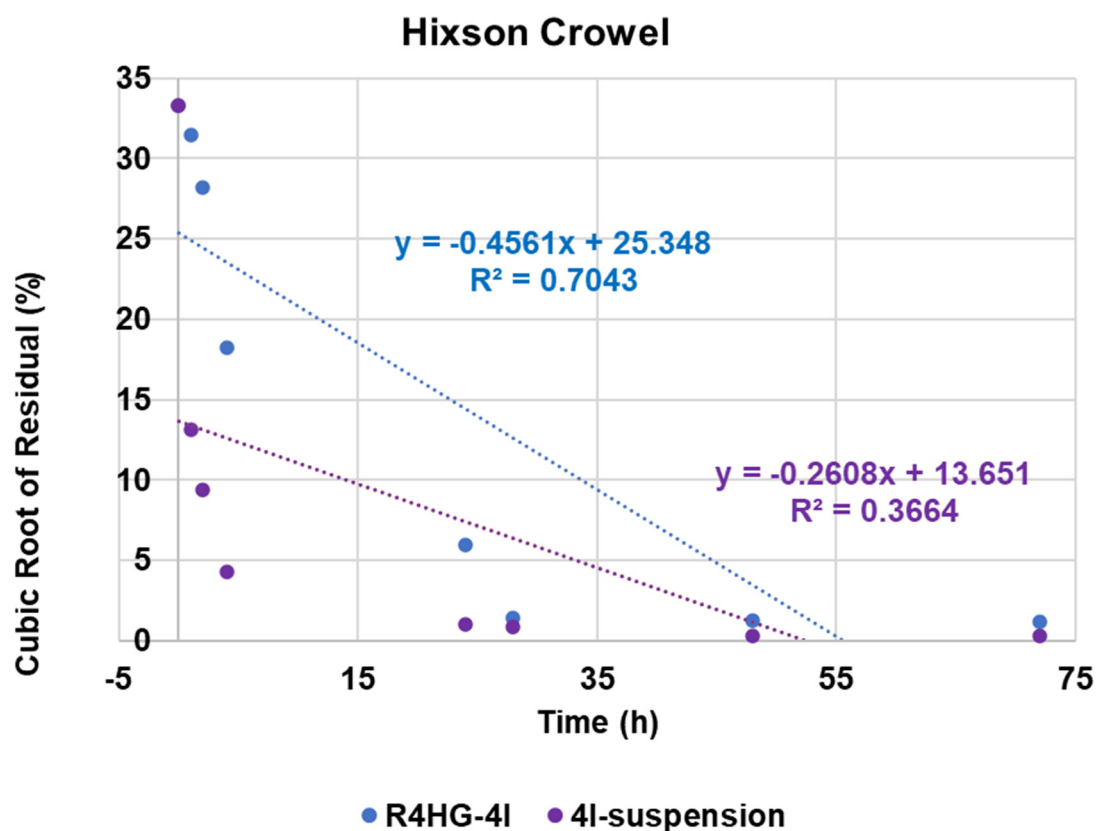

Figure S21. Hixson Crowel kinetic models.

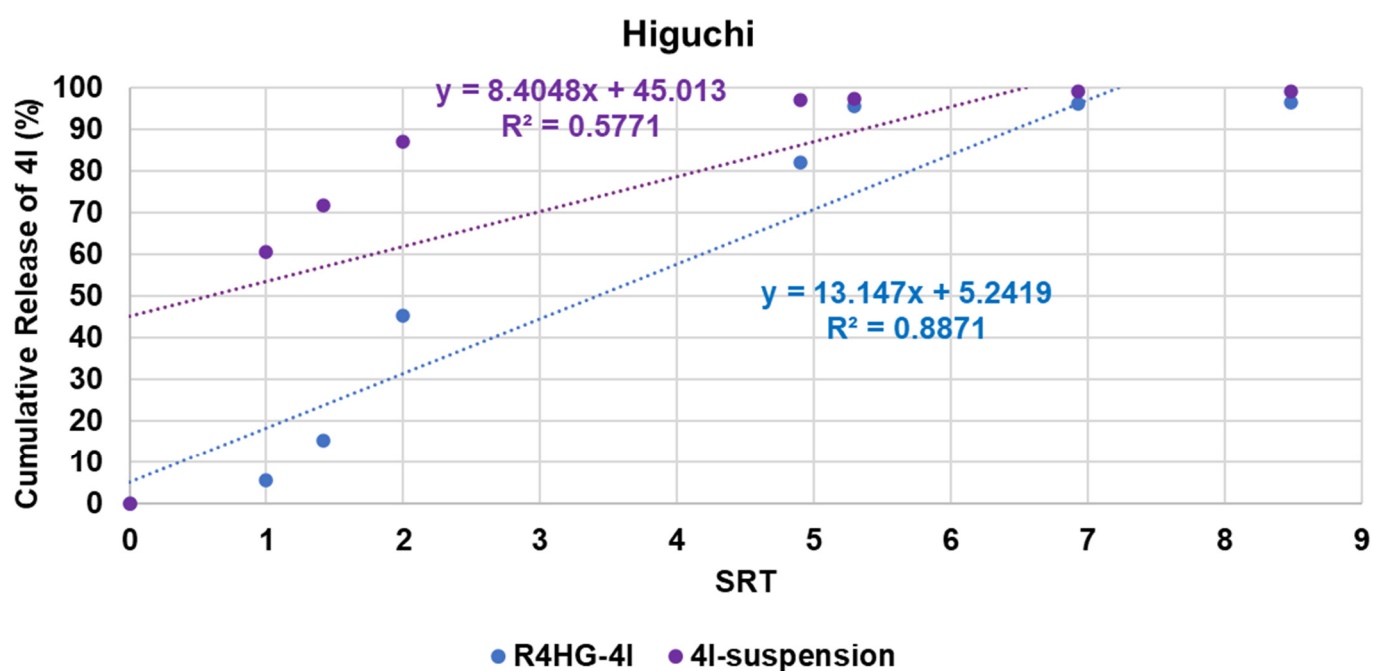

Figure S22. Higuchi kinetic models. SRT = square root of time.

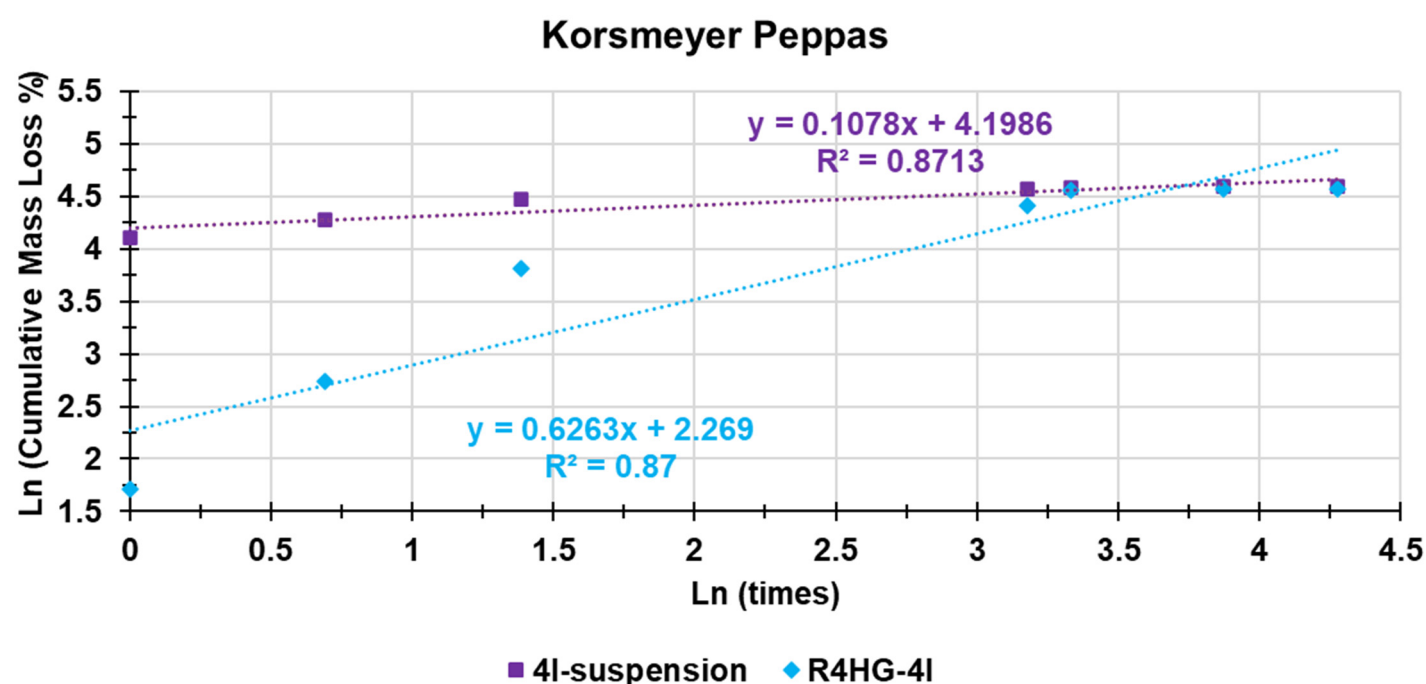

Figure S23. Korsmeyer Peppas kinetic models.

**Table S3.** Values of the coefficients of determination obtained for all the kinetic models used.

| Kinetic Model           | R <sup>2</sup> of R4HG-4I | R <sup>2</sup> of 4I-suspension |
|-------------------------|---------------------------|---------------------------------|
| Zero-order              | 0.7043                    | 0.3664                          |
| First-order             | 0.8194                    | 0.8141                          |
| Hixson–Crowel           | 0.7043                    | 0.3664                          |
| <b>Higuchi</b>          | <b>0.8871</b>             | <b>0.5771</b>                   |
| <b>Korsmeyer–Peppas</b> | <b>0.8700</b>             | <b>0.8713</b>                   |

**Disclaimer/Publisher's Note:** The statements, opinions and data contained in all publications are solely those of the individual author(s) and contributor(s) and not of MDPI and/or the editor(s). MDPI and/or the editor(s) disclaim responsibility for any injury to people or property resulting from any ideas, methods, instructions or products referred to in the content.
